# Supplementary material
Source: Elsevier journal article supplement (https://www.sciencedirect.com/science/article/pii/S0009739X15000342)
Supplement: mmc1 [file S0009739X15000342:mmc1.pdf]

## **ANEXO I. Cuestionario de satisfacción y Calidad percibida**

Encuesta de satisfacción de los Usuarios de la Unidad de Cirugía Mayor Ambulatoria y  
Corta Estancia

Hospital “Virgen de la Luz”. Cuenca. SESCOAM.

CUESTIONARIO DE SATISFACCION UTILIZACION PROGRAMA CMA – CE  
(Cirugia Mayor Ambulatoria – Corta Estancia)

1.- Soy una persona de género (señalar una respuesta)

☐ Masculino

☐ Femenino

2.- Edad

3.- Fecha de intervención

4.- ¿Qué nivel de estudios posee? (señale una respuesta)

☐ Ninguno

☐ primarios

☐ ESO.

☐ FEP.

☐ Universitarios

5.- Lugar de residencia respecto al Hospital (señalar una respuesta)

☐ A menos de 30 m. de viaje por carretera

☐ Entre 30 y 60bm. de viaje por carretera

☐ Entre 60 y 90 m. de viaje por carretera

☐ Más de 90 m. de viaje por carretera

Marque con una “x” lo que proceda

6.- ¿Le ha recomendado alguien esta Unidad ?

☐ Si

☐ No

7.- ¿Le hemos evitado trastornos familiares?

☐ Si

☐ No

8.- ¿Se va Vd. contento de la Unidad?

- ☐ Si ☐ No

9.- Si tuviera que volver a operarse ¿Lo haría en esta Unidad?

- ☐ Si ☐ No

10.- ¿Vd. o su familia entendieron nuestra información al ser dado de alta?

- ☐ Si ☐ No

11.- ¿Qué impresión le causó la Unidad?

- |                                   |                                      |
|-----------------------------------|--------------------------------------|
| <input type="checkbox"/> Muy mal  | <input type="checkbox"/> Mal         |
| <input type="checkbox"/> Regular. | <input type="checkbox"/> Bien.       |
| <input type="checkbox"/> Muy Bien | <input type="checkbox"/> No contesta |

12.- ¿Qué opinión le ha merecido a su familia ésta Unidad?

- |                                   |                                      |
|-----------------------------------|--------------------------------------|
| <input type="checkbox"/> Muy mal  | <input type="checkbox"/> Mal         |
| <input type="checkbox"/> Regular. | <input type="checkbox"/> Bien.       |
| <input type="checkbox"/> Muy Bien | <input type="checkbox"/> No contesta |

13.- ¿Cómo fue la Información sobre lo que se le iba a realizar?

- |                                   |                                      |
|-----------------------------------|--------------------------------------|
| <input type="checkbox"/> Muy mal  | <input type="checkbox"/> Mal         |
| <input type="checkbox"/> Regular. | <input type="checkbox"/> Bien.       |
| <input type="checkbox"/> Muy Bien | <input type="checkbox"/> No contesta |

14.- ¿Cómo ha sido atendido/a por el personal Administrativo?

- |                                   |                                      |
|-----------------------------------|--------------------------------------|
| <input type="checkbox"/> Muy mal  | <input type="checkbox"/> Mal         |
| <input type="checkbox"/> Regular. | <input type="checkbox"/> Bien.       |
| <input type="checkbox"/> Muy Bien | <input type="checkbox"/> No contesta |

15.- ¿Cómo ha sido atendido/a por el personal de Enfermería?

- |                                   |                                      |
|-----------------------------------|--------------------------------------|
| <input type="checkbox"/> Muy mal  | <input type="checkbox"/> Mal         |
| <input type="checkbox"/> Regular. | <input type="checkbox"/> Bien.       |
| <input type="checkbox"/> Muy Bien | <input type="checkbox"/> No contesta |

16.- ¿Cómo ha sido atendido/a por el personal Médico?

- |                                   |                                      |
|-----------------------------------|--------------------------------------|
| <input type="checkbox"/> Muy mal  | <input type="checkbox"/> Mal         |
| <input type="checkbox"/> Regular. | <input type="checkbox"/> Bien.       |
| <input type="checkbox"/> Muy Bien | <input type="checkbox"/> No contesta |

17.- ¿Cómo fue su experiencia con la Anestesia?

- |                                   |                                      |
|-----------------------------------|--------------------------------------|
| <input type="checkbox"/> Muy mal  | <input type="checkbox"/> Mal         |
| <input type="checkbox"/> Regular. | <input type="checkbox"/> Bien.       |
| <input type="checkbox"/> Muy Bien | <input type="checkbox"/> No contesta |

#### CUESTIONARIO DE CALIDAD PERCIBIDA POSTOPERATORIO EN PROGRAMA CMA-CE.

18.- ¿Cuántos días precisó ayuda en su domicilio para realizar actividades cotidianas? (señale una respuesta)

- |                                    |                                         |
|------------------------------------|-----------------------------------------|
| <input type="checkbox"/> Ninguno   | <input type="checkbox"/> de 1 a 3       |
| <input type="checkbox"/> De 3 a 7. | <input type="checkbox"/> Más de 7 días. |

19.- ¿Cuántas horas al día precisó ayuda en su domicilio para realizar actividades cotidianas? (señale una respuesta)

- |                                              |                                             |
|----------------------------------------------|---------------------------------------------|
| <input type="checkbox"/> Ninguna             | <input type="checkbox"/> de 10 a 30 minutos |
| <input type="checkbox"/> De 30 a 60 minutos. | <input type="checkbox"/> Más de 60 minutos. |

20.- ¿Quién realizó los cuidados a domicilio? (señale una respuesta)

- |                                       |                                           |
|---------------------------------------|-------------------------------------------|
| <input type="checkbox"/> Ninguno      | <input type="checkbox"/> Cónyuge/ pareja  |
| <input type="checkbox"/> Hija/hijo.   | <input type="checkbox"/> Hermana/hermano. |
| <input type="checkbox"/> Otra persona |                                           |

21.- ¿Cuántos días precisó analgesia oral por el dolor? (señale una respuesta)

- |                                            |                                             |
|--------------------------------------------|---------------------------------------------|
| <input type="checkbox"/> Ninguno           | <input type="checkbox"/> Menos de tres días |
| <input type="checkbox"/> Entre 3 y 7 días. | <input type="checkbox"/> Entre 7 y 14 días. |
| <input type="checkbox"/> Más de 14 días    |                                             |

22.- ¿Recomendaría a un familiar o amigo que precisara esta cirugía ser incluido en programa de CMA o corta estancia? Señale una respuesta

☐ Si

☐ No

23.- Nivel de Satisfacción global

0 1 2 3 4 5 6 7 8 9 10
